# Supplementary material for: A strategy to select suitable physicochemical attributes of amino acids for protein fold recognition
Source: Springer Nature journal article supplement (doi:10.1186/1471-2105-14-233), 2013-07-24

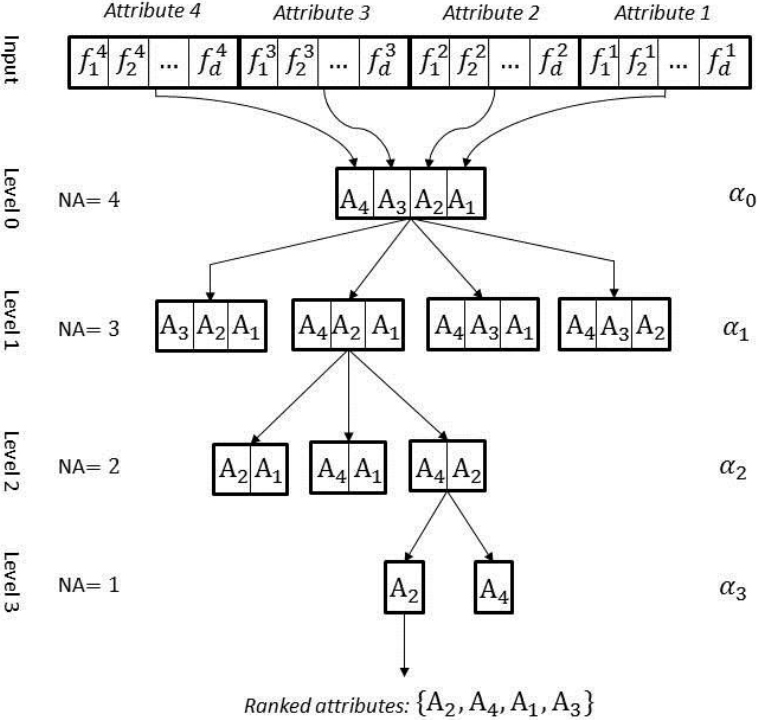

Supplement: 12859_2012_5986_MOESM1_ESM.pdf [file 12859_2012_5986_MOESM1_ESM.pdf]
