# Supplementary material for: A strategy to select suitable physicochemical attributes of amino acids for protein fold recognition
Source: Springer Nature journal article supplement (doi:10.1186/1471-2105-14-233), 2013-07-24
Supplement: 12859_2012_5986_MOESM2_ESM.pdf [file 12859_2012_5986_MOESM2_ESM.pdf]

NA= 1

NA= 2

NA= 3

NA= 4

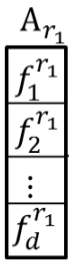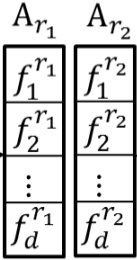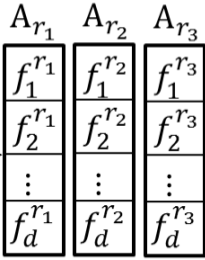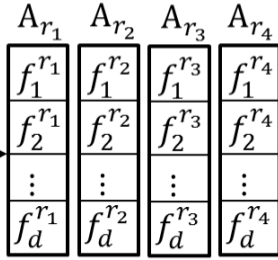

$$r_1 = \arg \max_{j=1\dots 4} \mathcal{H}(A_j)$$

$$r_2 = \arg \max_{\substack{j=1\dots 4 \\ j \neq r_1}} \mathcal{H}(A_{r_1}, A_j)$$

$$r_3 = \arg \max_{\substack{j=1\dots 4 \\ j \neq r_1, r_2}} \mathcal{H}(A_{r_1}, A_{r_2}, A_j)$$

$$r_4 \sim \{1, 2, 3, 4\}$$

$$r_4 \neq r_1, r_2, r_3$$

 $\alpha_0$  $\alpha_1$  $\alpha_2$  $\alpha_3$ 

Level 0

Level 1

Level 2

Level 3
